# Supplementary material
Source: MDPI journal article supplement (https://www.mdpi.com/1999-4907/15/4/583)
Supplement: s1 [file s1]

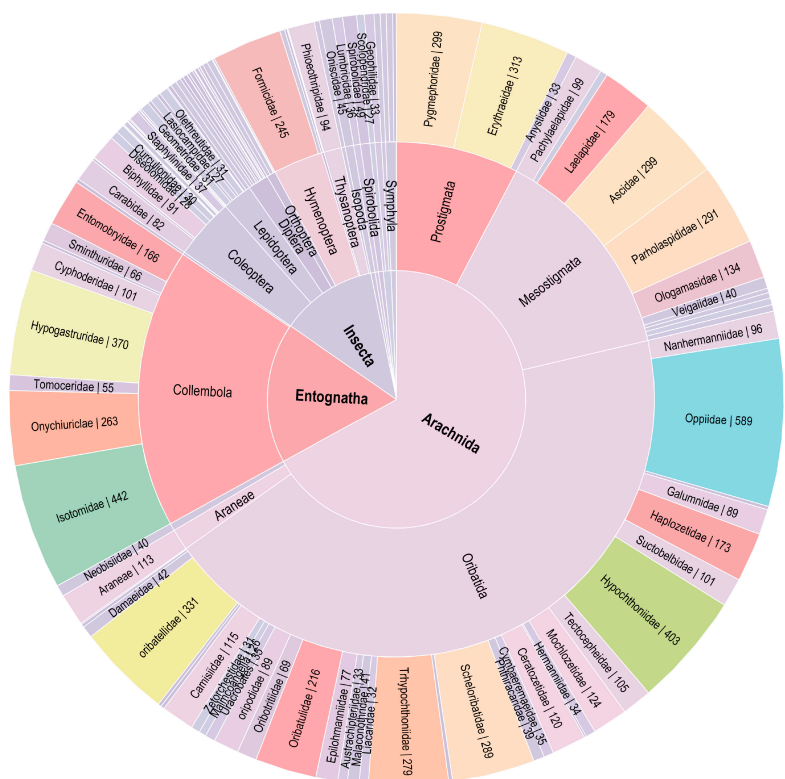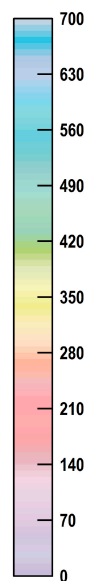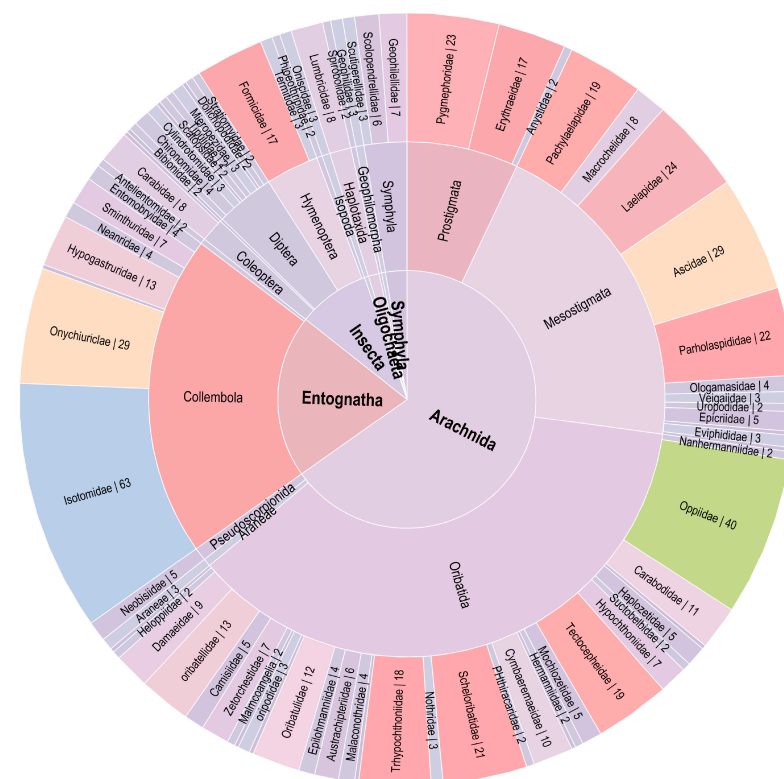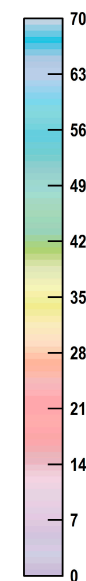

**Figure S1.** Soil invertebrate community composition and number distribution. The inner circle, middle circle, and outer circle represent the three levels of classification: class, order, and family. The numbers in the outer circle indicate the number of soil invertebrates classified at each family level. The interval of the ruler represents the color represented by the number of soil invertebrates in the graph.

**Table S1.** Composition of soil invertebrate community in the litter layer.

| Litter layer |                 |                   |                                         |    |    |    |               |    |    |    |                    |    |    |    |                     |    |    |    |       |                |           |
|--------------|-----------------|-------------------|-----------------------------------------|----|----|----|---------------|----|----|----|--------------------|----|----|----|---------------------|----|----|----|-------|----------------|-----------|
| Order        | Family          | Functional Groups | Mixed forest                            |    |    |    | Bamboo forest |    |    |    | Chinese fir forest |    |    |    | Broad-leaved forest |    |    |    | Total | Proportion (%) | Dominance |
|              |                 |                   | T1                                      | T2 | T3 | T4 | T1            | T2 | T3 | T4 | T1                 | T2 | T3 | T4 | T1                  | T2 | T3 | T4 |       |                |           |
|              |                 |                   | Number of individual soil invertebrates |    |    |    |               |    |    |    |                    |    |    |    |                     |    |    |    |       |                |           |
| Prostigmata  | Pygmephoridae   | Saprophage        |                                         | 25 | 21 | 29 | 67            | 21 | 27 | 12 | 17                 | 22 | 8  | 7  | 23                  | 15 | 3  | 2  | 299   | 3.57%          | ++        |
|              | Erythraeidae    | Predatory         | 33                                      | 51 | 31 | 39 | 16            |    | 18 | 39 | 22                 | 13 | 1  | 12 | 23                  | 2  | 3  | 10 | 313   | 3.73%          | ++        |
|              | Anystidae       | Predatory         | 1                                       | 2  | 2  | 10 |               | 7  |    | 5  |                    |    | 1  | 1  | 2                   | 1  |    | 1  | 33    | 0.39%          | +         |
| Mesostigmata | Pachylaelapidae | Predatory         | 4                                       | 6  | 6  | 16 | 17            | 1  |    | 13 | 7                  | 4  |    | 3  | 16                  |    | 3  | 3  | 99    | 1.18%          | ++        |
|              | Macrochelidae   | Saprophage        | 7                                       |    | 2  |    | 3             |    |    |    | 4                  |    |    |    | 7                   | 2  |    |    | 25    | 0.30%          | +         |
|              | Laelapidae      | Predatory         | 55                                      | 3  | 3  | 9  | 5             | 11 |    | 6  | 41                 |    |    | 6  | 31                  | 2  | 5  | 2  | 179   | 2.13%          | ++        |
|              | Ascidae         | Predatory         | 64                                      | 10 | 12 | 5  | 29            | 15 | 1  | 20 | 32                 | 5  | 2  | 18 | 41                  | 8  | 6  | 31 | 299   | 3.57%          | ++        |
|              | Parholaspididae | Saprophage        | 11                                      | 13 | 12 | 18 | 49            | 3  | 32 | 17 | 32                 | 8  | 9  | 15 | 18                  | 13 | 19 | 22 | 291   | 3.47%          | ++        |
|              | Ologamasidae    | Predatory         | 9                                       | 6  | 12 | 15 | 5             | 2  | 5  | 20 | 7                  | 6  | 5  | 8  | 15                  | 5  | 7  | 7  | 134   | 1.60%          | ++        |
|              | Veigaiidae      | Saprophage        | 9                                       |    |    | 5  |               |    |    | 5  |                    |    |    | 7  | 7                   |    |    | 7  | 40    | 0.48%          | +         |
|              | Uropodidae      | Predatory         |                                         |    |    |    |               |    |    |    | 6                  |    |    |    | 9                   | 1  |    |    | 16    | 0.19%          | +         |
|              | Epicriidae      | Predatory         |                                         |    | 1  | 5  |               |    | 1  | 3  |                    |    | 2  | 4  |                     |    |    | 3  | 19    | 0.23%          | +         |
|              | Eviphididae     | Saprophage        |                                         |    |    | 5  | 1             |    |    |    | 1                  |    |    | 1  | 11                  |    | 2  | 3  | 24    | 0.29%          | +         |
|              | Ameroseiidae    | Predatory         |                                         | 18 | 2  | 2  |               |    |    |    |                    |    |    |    |                     |    |    | 1  | 23    | 0.27%          | +         |
| Oribatida    | Nanhermanniidae | Saprophage        | 15                                      | 12 | 2  | 5  | 23            |    |    | 1  | 5                  | 3  | 2  | 7  | 7                   | 5  |    | 9  | 96    | 1.14%          | ++        |
|              | Oppiidae        | Saprophage        | 130                                     | 96 | 47 | 45 | 60            | 2  | 7  | 23 | 44                 | 32 | 2  | 20 | 51                  | 13 | 11 | 6  | 589   | 7.02%          | ++        |
|              | Carabodidae     | Saprophage        | 1                                       |    |    | 2  |               |    |    | 1  | 4                  | 1  | 1  |    | 1                   | 1  |    |    | 12    | 0.14%          | +         |
|              | Galumnidae      | Saprophage        | 3                                       | 9  | 7  | 8  | 9             | 11 |    | 1  | 17                 | 3  |    | 3  | 14                  |    | 1  | 3  | 89    | 1.06%          | ++        |

|                    |            |    |    |    |    |    |     |    |    |    |    |    |    |    |    |    |    |     |       |    |
|--------------------|------------|----|----|----|----|----|-----|----|----|----|----|----|----|----|----|----|----|-----|-------|----|
| Haplozetidae       | Saprophage | 17 | 15 | 10 | 9  | 20 | 7   | 10 | 17 | 7  | 2  | 7  | 6  | 20 | 8  | 11 | 7  | 173 | 2.06% | ++ |
| Suctobelbidae      | Saprophage | 3  | 21 | 15 | 4  | 15 |     | 16 | 14 |    |    |    |    |    | 2  | 1  | 10 | 101 | 1.20% | ++ |
| Hypochthoniidae    | Fungivore  | 94 | 32 | 14 | 17 | 64 | 120 | 4  | 15 | 1  | 5  | 6  | 4  | 13 | 5  | 8  | 1  | 403 | 4.81% | ++ |
| Tectocephidae      | Fungivore  | 12 | 2  | 6  | 13 | 14 | 2   |    | 8  | 15 | 4  | 2  | 4  | 3  | 7  | 5  | 8  | 105 | 1.25% | ++ |
| Mochlozetidae      | Fungivore  | 6  | 2  | 16 | 25 | 9  |     | 1  | 33 | 2  | 6  |    | 11 |    | 10 | 1  | 2  | 124 | 1.48% | ++ |
| Hermanniidae       | Fungivore  | 1  |    |    |    | 8  | 5   |    |    |    | 3  | 1  | 1  | 10 |    | 5  |    | 34  | 0.41% | +  |
| oribatidae         | Saprophage | 1  |    | 3  | 1  |    |     |    |    |    |    |    |    |    |    | 1  | 1  | 7   | 0.08% | +  |
| Ceratozetidae      | Saprophage |    | 9  |    | 5  |    |     | 20 | 36 | 7  |    | 26 | 9  |    |    |    | 8  | 120 | 1.43% | ++ |
| Cymbaeremacidae    | Phytophage |    |    |    |    |    | 1   |    |    | 16 |    | 1  | 1  | 5  | 5  | 2  | 4  | 35  | 0.42% | +  |
| Phthiracaridae     | Saprophage | 1  |    |    | 1  |    |     |    | 1  | 18 | 1  | 1  |    | 8  | 1  | 2  | 5  | 39  | 0.47% | +  |
| Scheloriobatidae   | Saprophage | 20 | 18 | 28 | 10 | 31 | 17  | 14 | 3  | 49 | 46 | 19 | 6  | 18 | 8  | 1  | 1  | 289 | 3.45% | ++ |
| Nothridae          | Saprophage | 3  |    | 2  | 2  |    |     |    |    | 5  |    |    |    |    |    | 2  |    | 14  | 0.17% | +  |
| Trhypochthoniidae  | Fungivore  | 29 | 8  | 4  | 18 | 72 | 10  | 9  | 7  | 57 | 5  | 2  | 1  | 39 | 7  | 5  | 6  | 279 | 3.33% | ++ |
| Liacaridae         | Saprophage | 2  | 1  |    |    | 4  | 7   |    | 1  |    | 2  | 4  | 2  | 5  | 1  | 1  | 2  | 32  | 0.38% | +  |
| Malaconothridae    | Saprophage | 8  | 15 | 2  |    |    |     | 4  | 3  | 4  |    | 2  |    |    |    |    | 3  | 41  | 0.49% | +  |
| Austrachipteriidae | Saprophage |    | 5  |    | 5  | 1  |     | 5  |    | 13 |    |    | 1  |    |    |    | 3  | 33  | 0.39% | +  |
| Epilohmanniidae    | Saprophage | 2  |    | 2  |    | 5  | 5   |    | 8  | 16 | 2  | 4  | 6  | 11 | 6  | 1  | 9  | 77  | 0.92% | +  |
| Oribatulidae       | Saprophage | 19 | 21 | 28 | 2  | 20 | 18  | 31 | 27 | 8  | 9  | 7  | 2  | 5  |    | 14 | 5  | 216 | 2.58% | ++ |
| Oribotritiidae     | Saprophage | 3  | 6  | 9  | 8  | 6  | 1   |    | 5  | 2  | 2  | 3  | 7  | 9  | 4  | 2  | 2  | 69  | 0.82% | +  |
| oripodidae         | Fungivore  | 2  |    | 8  | 2  | 44 | 11  |    | 1  | 10 | 2  |    | 3  | 3  | 1  |    | 2  | 89  | 1.06% | ++ |
| Uracrobates        | Predatory  |    |    |    | 6  | 1  | 3   | 8  | 8  | 1  |    | 2  |    | 2  | 1  |    | 3  | 35  | 0.42% | +  |
| Malmcoangelia      | Fungivore  | 7  |    |    |    | 11 |     |    |    |    | 1  |    |    | 7  |    |    |    | 26  | 0.31% | +  |
| Zetorchestidae     | Saprophage | 7  |    | 1  | 5  | 3  |     |    | 1  | 2  |    |    | 4  | 8  |    |    |    | 31  | 0.37% | +  |
| Camisiidae         | Fungivore  | 5  | 18 | 10 | 3  | 8  | 1   | 3  |    | 20 | 13 | 5  | 5  | 9  | 5  | 2  | 8  | 115 | 1.37% | ++ |
| Cepheidae          | Saprophage |    | 2  | 1  |    |    |     |    |    |    |    | 4  |    | 2  |    | 1  | 3  | 13  | 0.16% | +  |
| Hermanniellidae    | Predatory  | 4  |    |    |    | 3  |     |    |    | 4  |    |    |    |    |    | 1  |    | 12  | 0.14% | +  |

|            |                   |            |     |    |    |    |     |    |    |    |    |    |   |    |    |    |    |    |     |       |    |
|------------|-------------------|------------|-----|----|----|----|-----|----|----|----|----|----|---|----|----|----|----|----|-----|-------|----|
| Collembola | oribatellidae     | Saprophage | 27  | 10 | 9  | 13 | 120 | 13 | 34 | 17 | 31 | 2  | 9 | 10 | 21 | 1  | 11 | 3  | 331 | 3.95% | ++ |
|            | Damaciidae        | Saprophage | 1   | 1  |    | 1  |     | 6  | 5  |    | 4  | 1  | 3 | 2  | 8  | 3  |    | 7  | 42  | 0.50% | +  |
|            | Peloppiidae       | Saprophage |     | 2  |    |    |     |    | 4  |    |    |    |   |    |    |    |    | 6  | 12  | 0.14% | +  |
|            | Brachychthoniidae | Fungivore  |     |    |    | 3  |     |    |    |    |    |    |   | 1  |    |    |    |    | 4   | 0.05% | +  |
|            | Isotomidae        | Fungivore  | 114 | 28 | 8  | 22 | 64  | 18 | 1  | 15 | 44 | 17 | 1 | 9  | 55 | 29 | 9  | 8  | 442 | 5.27% | ++ |
|            | Onychiuridae      | Fungivore  | 67  | 6  | 8  | 7  | 20  | 89 |    | 11 | 13 | 3  | 1 | 5  | 22 | 5  | 5  | 1  | 263 | 3.14% | ++ |
|            | Tomoceridae       | Saprophage | 6   | 6  | 7  | 4  |     | 2  | 7  |    | 7  | 2  |   | 3  | 8  | 2  | 1  |    | 55  | 0.66% | +  |
|            | Hypogastruridae   | Omnivore   | 151 | 16 | 14 | 16 | 27  | 16 | 5  | 13 | 14 | 11 | 6 | 14 | 39 | 23 |    | 5  | 370 | 4.41% | ++ |
|            | Cyphoderidae      | Fungivore  | 5   | 1  | 8  | 10 | 8   |    | 1  | 11 | 6  | 6  | 5 | 15 | 5  | 14 |    | 6  | 101 | 1.20% | ++ |
|            | Neanridae         | Fungivore  | 7   |    |    |    |     |    |    | 2  |    |    |   |    |    |    | 2  |    | 11  | 0.13% | +  |
|            | Sminthuridae      | Saprophage | 1   | 4  | 8  | 8  | 3   |    | 6  | 3  | 1  | 3  | 4 | 6  | 7  | 3  | 2  | 7  | 66  | 0.79% | +  |
| Coleoptera | Entomobryidae     | Fungivore  | 39  | 26 | 5  | 10 | 7   | 12 |    |    | 31 | 4  | 6 | 7  | 9  | 1  | 3  | 6  | 166 | 1.98% | ++ |
|            | Carabidae         | Predatory  | 1   | 7  | 7  | 11 | 1   | 2  | 1  | 9  | 10 | 1  | 1 | 4  | 15 |    | 8  | 4  | 82  | 0.98% | +  |
|            | Erotylidae        | Fungivore  | 3   |    | 1  |    | 3   |    |    |    |    |    |   |    |    |    |    | 2  | 9   | 0.11% | +  |
|            | Nitidulidae       | Fungivore  |     |    |    |    | 1   |    |    |    |    |    |   |    |    |    |    |    | 1   | 0.01% | +  |
|            | Biphyllidae       | Phytophage | 5   |    |    | 14 | 9   | 2  |    | 19 | 3  | 2  |   | 16 | 5  | 4  |    | 12 | 91  | 1.09% | ++ |
|            | Diseolomidae      | Phytophage |     |    |    | 4  | 3   | 4  |    | 1  |    | 2  |   | 4  | 4  | 3  |    | 3  | 28  | 0.33% | +  |
|            | Curculionidae     | Phytophage |     | 3  |    | 3  | 3   | 4  |    | 2  | 2  | 1  |   | 2  |    | 3  |    | 7  | 30  | 0.36% | +  |
|            | Pselaphidae       | Phytophage |     |    |    |    |     |    |    |    | 3  |    |   |    | 1  |    |    |    | 4   | 0.05% | +  |
|            | Scaphidiidae      | Predatory  |     |    |    |    |     | 1  |    |    |    |    |   |    |    |    |    |    | 1   | 0.01% | +  |
|            | Chrysomelidae     | Phytophage |     | 2  |    | 2  |     | 3  |    |    |    | 2  |   | 3  |    | 2  |    | 2  | 16  | 0.19% | +  |
|            | Cucujidae         | Predatory  |     |    |    |    |     |    |    |    |    |    | 1 |    |    |    |    |    | 1   | 0.01% | +  |
|            | Endomychidae      | Fungivore  |     |    | 1  |    |     |    |    |    |    |    |   |    |    |    |    | 1  | 2   | 0.02% | +  |
|            | Elateridae        | Phytophage |     |    |    | 5  |     |    |    |    |    |    |   |    |    |    |    | 1  | 6   | 0.07% | +  |
|            | Scydmaenidae      | Predatory  |     |    |    |    |     |    |    |    |    |    |   | 4  |    |    |    |    | 4   | 0.05% | +  |
|            | Staphylinidae     | Predatory  | 6   |    | 3  | 2  | 2   |    |    | 5  | 6  | 1  |   |    | 7  | 1  |    | 4  | 37  | 0.44% | +  |

[illegible]

|                   |                   |            |    |    |    |    |    |    |   |    |    |   |    |    |    |    |    |   |     |       |    |
|-------------------|-------------------|------------|----|----|----|----|----|----|---|----|----|---|----|----|----|----|----|---|-----|-------|----|
|                   | Tettigoniidae     | Phytophage |    |    | 3  |    |    |    |   |    |    |   |    |    |    |    |    |   | 3   | 0.04% | +  |
|                   | Gryllidae         | Omnivore   |    |    |    |    |    |    | 1 | 1  | 2  |   | 1  | 1  |    |    |    |   | 6   | 0.07% | +  |
| Hymenoptera       | Formicidae        | Omnivore   | 26 | 15 | 15 | 6  | 25 | 17 | 5 | 16 | 42 | 7 | 10 | 7  | 18 | 15 | 12 | 9 | 245 | 2.92% | ++ |
|                   | Termitidae        | Omnivore   |    |    | 1  |    |    |    |   |    |    |   |    |    | 6  | 10 |    |   | 17  | 0.20% | +  |
| Blattaria         | Corydiidae        | Omnivore   | 1  |    |    |    |    |    |   |    |    |   |    |    | 8  |    |    |   | 9   | 0.11% | +  |
|                   | Blattaria         | Saprophage |    |    | 3  |    |    |    |   |    |    |   |    |    |    |    |    |   | 3   | 0.04% | +  |
| Araneae           | Araneae           | Predatory  | 15 | 9  | 5  | 15 | 2  | 5  | 2 | 11 | 6  | 4 | 6  | 10 | 6  | 7  | 3  | 7 | 113 | 1.35% | ++ |
| Thysanoptera      | Phloeothripidae   | Phytophage | 15 | 6  | 3  | 7  | 7  | 4  | 1 | 8  | 9  | 1 | 5  | 4  | 12 | 1  | 6  | 5 | 94  | 1.12% | ++ |
| Pseudoscorpionida | Neobisiidae       | Predatory  |    |    |    |    | 8  | 8  | 2 |    | 11 | 1 | 2  |    | 7  | 1  |    |   | 40  | 0.48% | +  |
| Mantodea          | Mantidae          | Predatory  |    | 2  | 2  | 4  | 4  | 1  | 2 | 3  | 1  |   |    |    |    |    |    |   | 19  | 0.23% | +  |
| Isopoda           | Oniscidae         | Saprophage | 2  | 1  | 2  | 6  | 2  | 1  | 2 | 4  | 9  | 3 | 1  | 4  | 5  | 1  | 1  | 1 | 45  | 0.54% | +  |
| Haplotaxida       | Lumbricidae       | Saprophage | 3  | 2  | 5  | 6  |    |    |   | 1  |    | 1 | 1  | 3  | 8  | 3  | 1  | 2 | 36  | 0.43% | +  |
| Protura           | Antelientomidae   | Fungivore  |    | 5  |    |    |    |    |   | 1  |    | 1 | 2  |    |    |    |    | 4 | 13  | 0.16% | +  |
| Spirobolida       | Spirobolidae      | Phytophage | 7  | 4  | 2  | 7  | 2  | 1  | 1 | 6  | 2  | 1 |    | 5  | 4  | 2  |    | 5 | 49  | 0.58% | +  |
| Araneida          | Scolopendridae    | Predatory  | 1  |    | 3  | 6  |    | 5  |   | 5  | 4  |   |    |    |    |    | 1  | 2 | 27  | 0.32% | +  |
| Geophilomorpha    | Geophilidae       | Predatory  |    |    | 2  | 11 | 1  | 1  | 1 | 6  | 4  | 2 |    | 3  | 2  |    |    |   | 33  | 0.39% | +  |
| Lithobiomorpha    | Lithobiidae       | Predatory  | 1  | 2  | 2  | 2  | 1  |    | 1 | 2  | 1  |   | 1  |    | 4  | 1  |    | 4 | 22  | 0.26% | +  |
| Symphyla          | Scutigereidae     | Saprophage |    | 3  | 2  | 2  | 1  | 1  | 2 | 3  | 1  |   |    |    | 2  |    |    | 4 | 21  | 0.25% | +  |
|                   | Scolopendrellidae | Saprophage |    | 2  | 2  | 2  |    | 4  | 1 | 3  |    | 3 |    | 2  |    |    |    | 3 | 22  | 0.26% | +  |
|                   | Geophilellidae    | Saprophage |    | 2  |    | 1  |    |    |   | 4  |    |   | 1  | 1  |    |    |    | 4 | 13  | 0.16% | +  |

Notes: T1: one week before the first typhoon (Hinnamnor). T2: one day after the first typhoon (Hinnamnor). T3: one day after the second typhoon (Muifa). T4: one week after the second typhoon (Muifa). The numbers in the table represent the number of soil invertebrates in each family. +, Rare group; ++, Frequent group; +++, Dominant group.

**Table S2.** Composition of soil invertebrate community in topsoil layer.

[illegible]

|                    |            |   |   |   |   |   |   |   |   |   |   |   |   |   |   |   |   |    |       |    |
|--------------------|------------|---|---|---|---|---|---|---|---|---|---|---|---|---|---|---|---|----|-------|----|
| Oppiidae           | Saprophage | 2 | 2 | 3 | 4 | 2 | 2 | 1 | 4 | 1 | 5 | 3 | 2 | 3 | 3 | 1 | 2 | 40 | 6.76% | ++ |
| Carabodidae        | Saprophage |   | 1 | 1 |   | 1 |   |   |   |   |   | 4 | 1 |   |   | 1 | 2 | 11 | 1.86% | ++ |
| Galumnidae         | Saprophage |   |   | 1 |   |   |   |   |   |   |   |   |   |   |   |   |   | 1  | 0.17% | +  |
| Haplozetidae       | Saprophage |   |   |   | 2 |   |   | 2 |   |   |   |   |   |   | 1 |   |   | 5  | 0.84% | +  |
| Suctobelbidae      | Saprophage |   |   |   |   |   |   | 1 |   |   |   |   |   | 1 |   |   |   | 2  | 0.34% | +  |
| Hypochthoniidae    | Fungivore  | 1 | 1 | 2 |   |   | 1 |   |   | 1 |   |   |   |   | 1 |   |   | 7  | 1.18% | ++ |
| Tectocephidae      | Fungivore  |   | 2 | 3 | 1 | 2 |   | 2 |   |   | 2 | 2 | 1 | 3 | 1 |   |   | 19 | 3.21% | ++ |
| Mochlozetidae      | Fungivore  | 1 |   |   |   |   |   |   | 2 |   |   |   |   |   |   |   | 2 | 5  | 0.84% | +  |
| Hermanniidae       | Fungivore  |   |   |   | 1 |   |   |   | 1 |   |   |   |   |   |   |   |   | 2  | 0.34% | +  |
| Ceratozetidae      | Saprophage |   |   |   |   |   |   |   |   |   |   |   | 1 |   |   |   |   | 1  | 0.17% | +  |
| Cymbaeremacidae    | Phytophage |   |   |   | 1 |   |   |   |   |   | 1 | 3 | 2 |   |   | 2 | 1 | 10 | 1.69% | ++ |
| PHthiracaridae     | Saprophage |   |   |   |   |   |   |   |   |   |   |   | 1 | 1 |   |   |   | 2  | 0.34% | +  |
| Scheloribatidae    | Saprophage | 2 |   |   | 1 |   | 1 |   | 3 | 1 | 1 | 3 |   | 2 |   | 4 | 3 | 21 | 3.55% | ++ |
| Nothridae          | Saprophage |   |   |   | 1 |   |   |   |   |   |   | 2 |   |   |   |   |   | 3  | 0.51% | +  |
| Trhypochthoniidae  | Fungivore  | 2 |   | 1 | 1 | 1 | 2 | 1 | 1 | 1 | 2 | 1 | 1 | 1 |   | 1 | 2 | 18 | 3.04% | ++ |
| Liacaridae         | Saprophage |   |   |   |   |   |   |   |   |   |   |   | 1 |   |   |   |   | 1  | 0.17% | +  |
| Malaconothridae    | Saprophage |   |   |   | 2 |   |   |   |   |   |   |   | 2 |   |   |   |   | 4  | 0.68% | +  |
| Austrachipteriidae | Saprophage |   |   | 2 | 3 |   |   |   | 1 |   |   |   |   |   |   |   |   | 6  | 1.01% | ++ |
| Epilohmanniidae    | Saprophage |   |   |   |   |   |   | 1 |   |   |   |   |   |   | 1 |   | 2 | 4  | 0.68% | +  |
| Oribatulidae       | Saprophage |   | 1 | 5 |   |   | 1 | 2 |   |   | 2 |   | 1 |   |   |   |   | 12 | 2.03% | ++ |
| Oribotritiidae     | Saprophage |   |   |   |   |   |   |   |   |   |   |   |   |   |   | 1 |   | 1  | 0.17% | +  |
| oripodidae         | Fungivore  |   | 1 | 1 |   |   |   |   |   |   |   |   | 1 |   |   |   |   | 3  | 0.51% | +  |
| Uracrobates        | Predatory  |   |   |   |   |   |   | 1 |   |   |   |   |   |   |   |   |   | 1  | 0.17% | +  |
| Malmcoangelia      | Fungivore  |   |   |   |   |   |   |   |   |   |   |   |   |   | 2 |   |   | 2  | 0.34% | +  |
| Zetorchestidae     | Saprophage |   |   |   |   |   | 1 |   |   |   | 2 | 1 |   |   | 2 |   | 1 | 7  | 1.18% | ++ |
| Camisiidae         | Fungivore  |   |   |   | 1 |   |   |   |   |   | 1 | 1 |   |   |   | 1 | 1 | 5  | 0.84% | +  |



|             |                 |            |   |   |   |   |   |   |   |   |   |   |   |   |   |   |   |   |    |        |     |
|-------------|-----------------|------------|---|---|---|---|---|---|---|---|---|---|---|---|---|---|---|---|----|--------|-----|
|             | oribatellidae   | Saprophage | 2 |   | 1 | 1 |   | 2 |   |   | 1 | 2 | 1 |   | 1 | 2 |   |   | 13 | 2.20%  | ++  |
|             | Damaeidae       | Saprophage |   | 1 |   | 5 |   | 1 |   |   |   | 1 |   | 1 |   |   |   |   | 9  | 1.52%  | ++  |
|             | Heloppiidae     | Saprophage |   |   |   |   |   |   | 1 |   |   |   | 1 |   |   |   |   |   | 2  | 0.34%  | +   |
|             | Ghiralovus      | Fungivore  |   |   |   |   |   |   | 1 |   |   |   |   |   |   |   |   |   | 1  | 0.17%  | +   |
| Collembola  | Isotomidae      | Fungivore  | 3 | 6 | 7 | 9 | 1 | 2 | 2 | 3 | 1 | 6 |   | 9 | 1 | 4 | 3 | 6 | 63 | 10.64% | +++ |
|             | Onychiuridae    | Fungivore  |   | 2 | 4 |   |   | 3 |   | 3 | 3 | 1 | 3 | 4 |   | 3 | 3 |   | 29 | 4.90%  | ++  |
|             | Tomoceridae     | Saprophage |   |   |   |   |   |   |   |   |   |   |   |   | 1 |   |   |   | 1  | 0.17%  | +   |
|             | Hypogastruridae | Omnivore   |   | 4 |   |   |   |   | 2 |   |   | 2 | 2 |   |   |   | 3 |   | 13 | 2.20%  | ++  |
|             | Neanidae        | Fungivore  |   | 1 |   |   |   |   |   |   |   |   | 1 |   |   |   | 2 |   | 4  | 0.68%  | +   |
|             | Sminthuridae    | Saprophage |   |   |   | 1 |   |   | 1 |   |   | 1 |   |   |   | 3 |   | 1 | 7  | 1.18%  | ++  |
|             | Entomobryidae   | Fungivore  |   | 1 |   | 1 |   | 1 | 1 |   |   |   |   |   |   |   |   |   | 4  | 0.68%  | +   |
| Coleoptera  | Carabidae       | Predatory  |   |   | 1 |   |   |   | 1 |   | 1 | 2 |   |   | 1 |   | 2 |   | 8  | 1.35%  | ++  |
|             | Scarabaeidae    | Phytophage |   |   |   |   |   |   |   |   |   | 1 |   |   |   |   |   |   | 1  | 0.17%  | +   |
| Lepidoptera | Geometridae     | Phytophage |   |   |   |   |   |   |   |   |   |   |   | 1 |   |   |   |   | 1  | 0.17%  | +   |
| Diptera     | Bibionidae      | Saprophage |   |   |   |   |   |   |   | 1 |   |   |   |   |   |   |   | 1 | 2  | 0.34%  | +   |
|             | Chironomidae    | Saprophage |   |   | 1 |   |   |   | 1 |   |   |   |   |   |   |   | 2 |   | 4  | 0.68%  | +   |
|             | Cylindrotomidae | Saprophage |   |   |   |   |   | 3 |   |   |   |   |   |   |   |   |   |   | 3  | 0.51%  | +   |
|             | Sciaridae       | Saprophage |   |   |   |   |   |   |   |   |   |   | 1 |   |   |   |   |   | 1  | 0.17%  | +   |
|             | Scatopsidae     | Saprophage |   |   |   |   |   |   |   | 2 |   |   |   |   |   |   |   |   | 2  | 0.34%  | +   |
|             | Tipulidae       | Saprophage |   |   |   |   |   |   |   | 1 |   |   |   | 1 |   |   |   |   | 2  | 0.34%  | +   |
|             | Mieropezidae    | Saprophage |   | 2 |   |   |   |   |   | 1 |   |   |   |   |   |   |   |   | 3  | 0.51%  | +   |
|             | Anthomyiidae    | Saprophage |   | 1 |   |   |   |   |   |   |   |   |   |   |   |   |   |   | 1  | 0.17%  | +   |
|             | Dolichopodidae  | Saprophage |   | 2 |   |   |   |   |   |   |   |   |   |   |   |   |   |   | 2  | 0.34%  | +   |
|             | Stratiomyidae   | Saprophage |   |   |   |   |   |   |   |   |   |   |   |   |   |   | 2 |   | 2  | 0.34%  | ++  |
| Hymenoptera | Formicidae      | Omnivore   |   | 3 | 4 | 1 |   |   | 1 | 2 |   | 3 | 1 |   |   | 1 |   | 1 | 17 | 2.87%  | ++  |
|             | Termitidae      | Omnivore   |   |   |   |   |   | 1 | 2 |   |   |   |   |   |   |   |   |   | 3  | 0.51%  | +   |

|                   |                   |            |   |   |   |   |   |   |   |   |   |   |       |       |    |
|-------------------|-------------------|------------|---|---|---|---|---|---|---|---|---|---|-------|-------|----|
| Araneae           | Araneae           | Predatory  |   |   | 2 |   | 1 |   |   |   |   | 3 | 0.51% | +     |    |
| Thysanoptera      | Phioethripidae    | Phytophage |   |   |   |   |   |   | 1 |   | 1 | 2 | 0.34% | +     |    |
| Pseudoscorpionida | Neobisiidae       | Predatory  | 1 |   |   |   | 1 |   | 1 | 1 | 1 | 5 | 0.84% | +     |    |
| Isopoda           | Oniscidae         | Saprophage | 1 |   |   |   | 2 |   |   |   |   | 3 | 0.51% | +     |    |
| Haplotaxida       | Lumbricidae       | Saprophage |   |   | 2 |   |   |   | 2 |   | 2 | 2 | 8     | 1.35% | ++ |
| Protura           | Antelientomidae   | Fungivore  |   |   |   |   |   |   | 2 |   |   | 2 | 0.34% | +     |    |
| Spirobolida       | Spirobolidae      | Phytophage |   |   |   |   |   |   |   |   |   | 2 | 2     | 0.34% | +  |
| Geophilomorpha    | Geophilidae       | Predatory  |   |   | 1 |   | 1 |   |   |   | 1 | 3 | 0.51% | +     |    |
| Symphyla          | Scutigerellidae   | Saprophage |   |   | 1 |   | 1 |   |   |   | 1 | 3 | 0.51% | +     |    |
|                   | Scolopendrellidae | Saprophage |   | 1 | 1 | 1 |   | 1 | 2 |   |   | 6 | 1.01% | ++    |    |
|                   | Geophilellidae    | Saprophage |   |   | 2 | 1 | 1 | 1 |   |   | 2 | 7 | 1.18% | ++    |    |

Notes: T1: one week before the first typhoon (Hinnamnor). T2: one day after the first typhoon (Hinnamnor). T3: one day after the second typhoon (Muifa). T4: one week after the second typhoon (Muifa). The numbers in the table represent the number of soil invertebrates in each family. +, Rare group; ++, Frequent group; +++, Dominant group.
